# Supplementary material for: FLAML version 2.3.3 model-based assessment of gross primary productivity at forest, grassland, and cropland ecosystem sites
Source: Copernicus journal article supplement (doi:10.5194/gmd-2024-169), 2025-01-17
Supplement: Supplementary file 1 [file gmd-2024-169-supplement.pdf]

## Article Supplementary information

**Table S1**

Optimal algorithms for modeling GPP in forest ecosystems with different combinations of temporal scales and indicators.

| FLAML   | Daily      | 8-day      | 16-day         | Monthly    |
|---------|------------|------------|----------------|------------|
| FLAML00 | extra_tree | extra_tree | extra_tree     | extra_tree |
| FLAML01 | extra_tree | extra_tree | extra_tree     | extra_tree |
| FLAML02 | extra_tree | extra_tree | extra_tree     | extra_tree |
| FLAML03 | extra_tree | extra_tree | xgb_limitdepth | extra_tree |
| FLAML04 | rf         | rf         | extra_tree     | extra_tree |
| FLAML05 | extra_tree | extra_tree | extra_tree     | extra_tree |
| FLAML06 | extra_tree | extra_tree | extra_tree     | extra_tree |
| FLAML07 | extra_tree | rf         | extra_tree     | extra_tree |
| FLAML08 | extra_tree | extra_tree | extra_tree     | extra_tree |
| FLAML10 | extra_tree | extra_tree | extra_tree     | extra_tree |
| FLAML11 | lgbm       | extra_tree | extra_tree     | extra_tree |
| FLAML12 | extra_tree | extra_tree | extra_tree     | extra_tree |
| FLAML13 | extra_tree | extra_tree | extra_tree     | extra_tree |
| FLAML14 | lgbm       | extra_tree | extra_tree     | extra_tree |
| FLAML15 | extra_tree | extra_tree | extra_tree     | extra_tree |
| FLAML16 | extra_tree | extra_tree | extra_tree     | extra_tree |
| FLAML17 | rf         | rf         | rf             | extra_tree |
| FLAML18 | extra_tree | extra_tree | extra_tree     | extra_tree |

**Table S2**

R<sup>2</sup>, SD, RMSE for ALF station.

| FLAML           | R <sup>2</sup> | SD    | RMSE  | nuRMSE | TSS    |
|-----------------|----------------|-------|-------|--------|--------|
| FLAML00         | 0.70           | 0.934 | 1.108 | 0.540  | 0.9167 |
| FLAML01         | 0.64           | 0.939 | 1.203 | 0.587  | 0.9063 |
| FLAML02         | 0.66           | 0.957 | 1.177 | 0.574  | 0.9153 |
| FLAML03         | 0.67           | 1.051 | 1.164 | 0.567  | 0.9225 |
| FLAML04         | 0.66           | 0.989 | 1.172 | 0.575  | 0.9146 |
| FLAML05         | 0.65           | 1.077 | 1.184 | 0.576  | 0.9195 |
| FLAML06         | 0.66           | 0.940 | 1.172 | 0.574  | 0.9072 |
| FLAML07         | 0.65           | 0.930 | 1.199 | 0.586  | 0.9005 |
| FLAML08         | 0.66           | 0.972 | 1.177 | 0.576  | 0.9117 |
| FLAML10         | 0.66           | 0.973 | 1.167 | 0.570  | 0.9146 |
| FLAML11         | 0.64           | 0.948 | 1.219 | 0.598  | 0.9001 |
| FLAML12         | 0.59           | 1.042 | 1.296 | 0.635  | 0.9046 |
| FLAML13         | 0.63           | 1.057 | 1.223 | 0.597  | 0.9121 |
| FLAML14         | 0.59           | 1.066 | 1.295 | 0.637  | 0.8896 |
| FLAML15         | 0.56           | 1.114 | 1.350 | 0.663  | 0.8972 |
| FLAML16         | 0.64           | 0.982 | 1.219 | 0.596  | 0.9096 |
| FLAML17         | 0.62           | 0.982 | 1.248 | 0.612  | 0.9051 |
| FLAML18         | 0.57           | 1.034 | 1.333 | 0.654  | 0.9014 |
| Flux(average)   | 0.66           | 0.976 | 1.173 | 0.573  |        |
| ERA5(average)   | 0.61           | 1.022 | 1.261 | 0.618  |        |
| Forest(average) | 0.64           | 0.999 | 1.217 | 0.595  |        |

**Table S3**R<sup>2</sup>, SD, RMSE for CBF station.

| FLAML           | R <sup>2</sup> | SD    | RMSE  | nuRMSE | TSS    |
|-----------------|----------------|-------|-------|--------|--------|
| FLAML00         | 0.94           | 0.827 | 1.073 | 0.249  | 0.9533 |
| FLAML01         | 0.92           | 0.779 | 1.226 | 0.285  | 0.9296 |
| FLAML02         | 0.92           | 0.781 | 1.211 | 0.281  | 0.9302 |
| FLAML03         | 0.92           | 0.833 | 1.162 | 0.269  | 0.9456 |
| FLAML04         | 0.92           | 0.852 | 1.174 | 0.273  | 0.9525 |
| FLAML05         | 0.92           | 0.799 | 1.210 | 0.281  | 0.9359 |
| FLAML06         | 0.94           | 0.845 | 1.062 | 0.246  | 0.9560 |
| FLAML07         | 0.93           | 0.844 | 1.124 | 0.261  | 0.9547 |
| FLAML08         | 0.93           | 0.819 | 1.135 | 0.263  | 0.9480 |
| FLAML10         | 0.94           | 0.846 | 1.041 | 0.241  | 0.9591 |
| FLAML11         | 0.92           | 0.808 | 1.181 | 0.274  | 0.9425 |
| FLAML12         | 0.92           | 0.788 | 1.174 | 0.273  | 0.9333 |
| FLAML13         | 0.93           | 0.803 | 1.135 | 0.263  | 0.9416 |
| FLAML14         | 0.92           | 0.807 | 1.180 | 0.274  | 0.9413 |
| FLAML15         | 0.92           | 0.781 | 1.217 | 0.282  | 0.9263 |
| FLAML16         | 0.93           | 0.821 | 1.121 | 0.260  | 0.9467 |
| FLAML17         | 0.94           | 0.938 | 1.031 | 0.239  | 0.9819 |
| FLAML18         | 0.93           | 0.817 | 1.149 | 0.267  | 0.9458 |
| Flux(average)   | 0.93           | 0.820 | 1.153 | 0.268  |        |
| ERA5(average)   | 0.93           | 0.823 | 1.137 | 0.264  |        |
| Forest(average) | 0.93           | 0.822 | 1.145 | 0.266  |        |

**Table S4**R<sup>2</sup>, SD, RMSE for QYF station.

| FLAML           | R <sup>2</sup> | SD    | RMSE  | nuRMSE | TSS    |
|-----------------|----------------|-------|-------|--------|--------|
| FLAML00         | 0.91           | 0.917 | 0.676 | 0.297  | 0.9705 |
| FLAML01         | 0.93           | 0.927 | 0.617 | 0.270  | 0.9754 |
| FLAML02         | 0.92           | 0.937 | 0.655 | 0.287  | 0.9739 |
| FLAML03         | 0.90           | 0.918 | 0.697 | 0.307  | 0.9691 |
| FLAML04         | 0.93           | 0.932 | 0.609 | 0.266  | 0.9771 |
| FLAML05         | 0.92           | 0.931 | 0.653 | 0.286  | 0.9741 |
| FLAML06         | 0.90           | 0.910 | 0.698 | 0.307  | 0.9682 |
| FLAML07         | 0.92           | 0.926 | 0.636 | 0.279  | 0.9751 |
| FLAML08         | 0.91           | 0.938 | 0.673 | 0.296  | 0.9737 |
| FLAML10         | 0.89           | 0.925 | 0.731 | 0.319  | 0.9676 |
| FLAML11         | 0.90           | 0.923 | 0.720 | 0.314  | 0.9681 |
| FLAML12         | 0.90           | 0.938 | 0.730 | 0.320  | 0.9695 |
| FLAML13         | 0.89           | 0.918 | 0.734 | 0.321  | 0.9666 |
| FLAML14         | 0.90           | 0.928 | 0.693 | 0.301  | 0.9710 |
| FLAML15         | 0.90           | 0.928 | 0.722 | 0.316  | 0.9693 |
| FLAML16         | 0.89           | 0.920 | 0.746 | 0.326  | 0.9658 |
| FLAML17         | 0.91           | 0.939 | 0.678 | 0.296  | 0.9742 |
| FLAML18         | 0.90           | 0.942 | 0.720 | 0.315  | 0.9708 |
| Flux(average)   | 0.92           | 0.926 | 0.657 | 0.288  |        |
| ERA5(average)   | 0.90           | 0.929 | 0.719 | 0.314  |        |
| Forest(average) | 0.91           | 0.928 | 0.688 | 0.301  |        |

**Table S5**

Annual Observed GPP for forest stations.

| FLAML   | ALF     | BNF     | CBF     | DHF     | HZF    | MEF     | QYF     |
|---------|---------|---------|---------|---------|--------|---------|---------|
| 2003    |         | 2465.49 | 1454.80 | 1460.63 |        |         | 1704.82 |
| 2004    |         | 2598.21 | 1376.82 | 1418.54 |        |         | 1882.95 |
| 2005    |         | 2550.77 | 1192.84 | 1254.00 |        |         | 1646.81 |
| 2006    |         | 2535.49 | 1642.28 | 1460.02 |        |         | 1843.38 |
| 2007    |         | 2610.95 | 1567.89 | 1552.94 |        |         | 1847.33 |
| 2008    |         | 2415.08 | 1518.81 | 1387.86 |        |         | 1756.77 |
| 2009    | 2113.10 | 2146.42 | 1622.47 | 1354.39 |        |         | 1852.84 |
| 2010    | 2204.39 | 2243.15 | 1331.03 | 1422.73 |        |         | 1926.25 |
| 2011    | 2231.40 | 2826.87 |         |         |        |         |         |
| 2012    | 2087.80 | 2664.65 |         |         |        |         |         |
| 2013    | 1888.94 | 2860.98 |         |         |        |         |         |
| 2014    |         | 2405.34 |         |         | 764.73 |         |         |
| 2015    |         | 2548.65 |         |         | 831.30 |         |         |
| 2016    |         |         |         |         | 858.41 | 1413.72 |         |
| 2017    |         |         |         |         | 824.89 | 1466.58 |         |
| 2018    |         |         |         |         | 845.04 | 1421.83 |         |
| Average | 2105.12 | 2528.62 | 1463.37 | 1413.89 | 824.87 | 1434.04 | 1807.64 |

**Table S6**

Optimal algorithms for modeling GPP in grass ecosystems with different combinations of temporal resolution and indicators.

| FLAML   | Daily      | 8-day      | 16-day     | Monthly    |
|---------|------------|------------|------------|------------|
| FLAML00 | extra_tree | extra_tree | extra_tree | extra_tree |
| FLAML01 | extra_tree | extra_tree | extra_tree | extra_tree |
| FLAML02 | extra_tree | extra_tree | extra_tree | xgboost    |
| FLAML03 | extra_tree | extra_tree | extra_tree | extra_tree |
| FLAML04 | xgboost    | extra_tree | extra_tree | extra_tree |
| FLAML05 | extra_tree | extra_tree | extra_tree | extra_tree |
| FLAML06 | extra_tree | extra_tree | rf         | rf         |
| FLAML07 | lgbm       | xgboost    | lgbm       | extra_tree |
| FLAML08 | extra_tree | rf         | lgbm       | rf         |
| FLAML10 | extra_tree | extra_tree | extra_tree | extra_tree |
| FLAML11 | lgbm       | extra_tree | extra_tree | extra_tree |
| FLAML12 | extra_tree | extra_tree | extra_tree | extra_tree |
| FLAML13 | extra_tree | extra_tree | rf         | extra_tree |
| FLAML14 | extra_tree | extra_tree | extra_tree | extra_tree |
| FLAML15 | extra_tree | extra_tree | extra_tree | extra_tree |
| FLAML16 | extra_tree | xgboost    | rf         | extra_tree |
| FLAML17 | extra_tree | lgbm       | lgbm       | rf         |
| FLAML18 | extra_tree | lgbm       | lgbm       | rf         |

**Table S7**R<sup>2</sup>, SD, RMSE for DXG alpine meadows station.

| FLAML           | R <sup>2</sup> | SD    | RMSE  | nuRMSE | TSS    |
|-----------------|----------------|-------|-------|--------|--------|
| FLAML00         | 0.83           | 0.865 | 0.298 | 0.412  | 0.9379 |
| FLAML01         | 0.81           | 0.880 | 0.316 | 0.437  | 0.9316 |
| FLAML02         | 0.85           | 0.907 | 0.282 | 0.390  | 0.9539 |
| FLAML03         | 0.82           | 0.921 | 0.303 | 0.420  | 0.9471 |
| FLAML04         | 0.62           | 1.077 | 0.414 | 0.571  | 0.9009 |
| FLAML05         | 0.84           | 0.957 | 0.287 | 0.398  | 0.9567 |
| FLAML06         | 0.74           | 1.049 | 0.365 | 0.504  | 0.9352 |
| FLAML07         | 0.65           | 1.101 | 0.421 | 0.582  | 0.9156 |
| FLAML08         | 0.73           | 1.125 | 0.370 | 0.511  | 0.9323 |
| FLAML10         | 0.83           | 0.866 | 0.294 | 0.407  | 0.9386 |
| FLAML11         | 0.79           | 0.864 | 0.322 | 0.446  | 0.9221 |
| FLAML12         | 0.87           | 0.906 | 0.258 | 0.357  | 0.9587 |
| FLAML13         | 0.79           | 0.935 | 0.332 | 0.460  | 0.9403 |
| FLAML14         | 0.79           | 0.912 | 0.328 | 0.454  | 0.9368 |
| FLAML15         | 0.85           | 0.952 | 0.278 | 0.385  | 0.9588 |
| FLAML16         | 0.75           | 1.011 | 0.355 | 0.492  | 0.9395 |
| FLAML17         | 0.66           | 1.076 | 0.418 | 0.579  | 0.9185 |
| FLAML18         | 0.75           | 1.087 | 0.360 | 0.499  | 0.9389 |
| Flux(average)   | 0.77           | 0.987 | 0.339 | 0.469  |        |
| ERA5(average)   | 0.79           | 0.957 | 0.327 | 0.453  |        |
| Forest(average) | 0.78           | 0.972 | 0.333 | 0.461  |        |

**Table S8**R<sup>2</sup>, SD, RMSE for DLG grassland station.

| FLAML           | R <sup>2</sup> | SD    | RMSE  | nuRMSE | TSS    |
|-----------------|----------------|-------|-------|--------|--------|
| FLAML00         | 0.82           | 0.824 | 0.806 | 0.427  | 0.9388 |
| FLAML01         | 0.84           | 0.853 | 0.753 | 0.398  | 0.9518 |
| FLAML02         | 0.83           | 0.826 | 0.779 | 0.412  | 0.9403 |
| FLAML03         | 0.81           | 0.825 | 0.814 | 0.431  | 0.9384 |
| FLAML04         | 0.79           | 0.809 | 0.854 | 0.452  | 0.9265 |
| FLAML05         | 0.79           | 0.793 | 0.858 | 0.454  | 0.9237 |
| FLAML06         | 0.84           | 0.856 | 0.747 | 0.395  | 0.9516 |
| FLAML07         | 0.85           | 0.880 | 0.724 | 0.382  | 0.9577 |
| FLAML08         | 0.85           | 0.870 | 0.726 | 0.383  | 0.9557 |
| FLAML10         | 0.82           | 0.832 | 0.805 | 0.426  | 0.9407 |
| FLAML11         | 0.83           | 0.840 | 0.778 | 0.411  | 0.9462 |
| FLAML12         | 0.83           | 0.830 | 0.767 | 0.405  | 0.9427 |
| FLAML13         | 0.83           | 0.845 | 0.785 | 0.415  | 0.9449 |
| FLAML14         | 0.82           | 0.834 | 0.803 | 0.424  | 0.9407 |
| FLAML15         | 0.82           | 0.812 | 0.809 | 0.428  | 0.9329 |
| FLAML16         | 0.84           | 0.864 | 0.764 | 0.404  | 0.9528 |
| FLAML17         | 0.86           | 0.880 | 0.693 | 0.366  | 0.9606 |
| FLAML18         | 0.84           | 0.855 | 0.749 | 0.396  | 0.9501 |
| Flux(average)   | 0.83           | 0.837 | 0.785 | 0.415  |        |
| ERA5(average)   | 0.83           | 0.844 | 0.773 | 0.408  |        |
| Forest(average) | 0.83           | 0.840 | 0.779 | 0.412  |        |

**Table S9**R<sup>2</sup>, SD, RMSE for HBG\_S01 alpine scrub station.

| FLAML           | R <sup>2</sup> | SD    | RMSE  | nuRMSE | TSS    |
|-----------------|----------------|-------|-------|--------|--------|
| FLAML00         | 0.79           | 1.038 | 1.118 | 0.455  | 0.9503 |
| FLAML01         | 0.78           | 1.065 | 1.144 | 0.465  | 0.9465 |
| FLAML02         | 0.82           | 1.014 | 1.042 | 0.424  | 0.9558 |
| FLAML03         | 0.80           | 0.999 | 1.100 | 0.448  | 0.9507 |
| FLAML04         | 0.80           | 0.996 | 1.098 | 0.446  | 0.9503 |
| FLAML05         | 0.83           | 0.976 | 1.002 | 0.408  | 0.9572 |
| FLAML06         | 0.78           | 1.068 | 1.144 | 0.465  | 0.9484 |
| FLAML07         | 0.78           | 1.096 | 1.161 | 0.472  | 0.9458 |
| FLAML08         | 0.81           | 1.062 | 1.075 | 0.437  | 0.9534 |
| FLAML10         | 0.77           | 1.057 | 1.177 | 0.479  | 0.9456 |
| FLAML11         | 0.76           | 1.082 | 1.209 | 0.491  | 0.9415 |
| FLAML12         | 0.79           | 1.060 | 1.119 | 0.455  | 0.9498 |
| FLAML13         | 0.78           | 1.017 | 1.154 | 0.469  | 0.9467 |
| FLAML14         | 0.79           | 1.029 | 1.134 | 0.461  | 0.9488 |
| FLAML15         | 0.81           | 1.010 | 1.076 | 0.438  | 0.9529 |
| FLAML16         | 0.76           | 1.084 | 1.210 | 0.492  | 0.9425 |
| FLAML17         | 0.75           | 1.110 | 1.227 | 0.499  | 0.9394 |
| FLAML18         | 0.80           | 1.059 | 1.107 | 0.450  | 0.9517 |
| Flux(average)   | 0.80           | 1.035 | 1.098 | 0.447  |        |
| ERA5(average)   | 0.78           | 1.057 | 1.157 | 0.471  |        |
| Forest(average) | 0.79           | 1.046 | 1.128 | 0.459  |        |

**Table S10**

Annual GPP for grass stations.

| FLAML   | DLG    | DMG    | DXG    | HBG_G01  | HBG_S01 | NMG    | XLG    |
|---------|--------|--------|--------|----------|---------|--------|--------|
| 2003    |        |        | 222.67 |          | 500.05  |        |        |
| 2004    |        |        | 172.16 |          | 552.49  | 356.04 |        |
| 2005    |        |        | 124.36 |          | 583.03  | 93.27  |        |
| 2006    | 690.16 |        | 188.13 |          | 958.56  | 385.63 | 282.73 |
| 2007    | 398.08 |        | 280.00 |          | 1000.05 | 360.54 | 464.25 |
| 2008    | 722.04 |        | 158.09 |          | 1004.61 | 467.04 | 574.42 |
| 2009    | 447.64 |        | 183.96 |          | 1035.98 | 155.60 | 321.30 |
| 2010    | 577.13 |        | 222.67 |          | 1071.99 | 549.31 | 337.72 |
| 2011    | 780.13 |        |        |          | 463.84  |        | 611.31 |
| 2012    | 752.98 |        |        |          | 467.26  |        | 754.28 |
| 2013    | 848.84 |        |        |          | 484.04  |        | 838.33 |
| 2014    | 663.70 |        |        |          |         |        | 553.47 |
| 2015    | 713.23 | 110.40 |        | 942.6199 |         |        |        |
| 2016    |        | 237.39 |        | 940.1182 |         |        |        |
| 2017    |        | 146.02 |        | 933.3493 |         |        |        |
| 2018    |        | 397.67 |        | 974.3658 |         |        |        |
| 2019    |        |        |        | 1028.5   |         |        |        |
| 2020    |        |        |        | 961.4318 |         |        |        |
| Average | 659.39 | 222.87 | 189.91 | 963.398  | 738.35  | 338.20 | 526.42 |

**Table S11**

Optimal algorithms for modeling GPP in cropland ecosystems with different combinations of temporal scales and indicators

| FLAML   | Daily      | 8-day      | 16-day         | Monthly    |
|---------|------------|------------|----------------|------------|
| FLAML00 | extra_tree | extra_tree | extra_tree     | extra_tree |
| FLAML01 | extra_tree | extra_tree | extra_tree     | extra_tree |
| FLAML02 | extra_tree | extra_tree | extra_tree     | rf         |
| FLAML03 | extra_tree | extra_tree | extra_tree     | extra_tree |
| FLAML04 | extra_tree | extra_tree | extra_tree     | extra_tree |
| FLAML05 | extra_tree | extra_tree | rf             | extra_tree |
| FLAML06 | extra_tree | extra_tree | extra_tree     | extra_tree |
| FLAML07 | extra_tree | extra_tree | extra_tree     | extra_tree |
| FLAML08 | extra_tree | extra_tree | extra_tree     | extra_tree |
| FLAML10 | extra_tree | extra_tree | extra_tree     | extra_tree |
| FLAML11 | extra_tree | extra_tree | lgbm           | extra_tree |
| FLAML12 | rf         | rf         | lgbm           | rf         |
| FLAML13 | extra_tree | extra_tree | extra_tree     | rf         |
| FLAML14 | extra_tree | extra_tree | extra_tree     | extra_tree |
| FLAML15 | rf         | extra_tree | extra_tree     | extra_tree |
| FLAML16 | extra_tree | extra_tree | extra_tree     | extra_tree |
| FLAML17 | extra_tree | extra_tree | extra_tree     | lgbm       |
| FLAML18 | rf         | extra_tree | xgb_limitdepth | lgbm       |

**Table S12**

R<sup>2</sup>, SD, RMSE for JZA station (single cropping farmland station).

| FLAML           | R <sup>2</sup> | SD    | RMSE  | nuRMSE | TSS    |
|-----------------|----------------|-------|-------|--------|--------|
| FLAML00         | 0.88           | 0.948 | 1.628 | 0.348  | 0.9614 |
| FLAML01         | 0.87           | 0.878 | 1.703 | 0.365  | 0.9441 |
| FLAML02         | 0.88           | 0.913 | 1.580 | 0.338  | 0.9607 |
| FLAML03         | 0.86           | 0.954 | 1.711 | 0.367  | 0.9599 |
| FLAML04         | 0.86           | 0.888 | 1.723 | 0.369  | 0.9429 |
| FLAML05         | 0.87           | 0.938 | 1.699 | 0.364  | 0.9536 |
| FLAML06         | 0.85           | 0.971 | 1.769 | 0.379  | 0.9565 |
| FLAML07         | 0.87           | 0.896 | 1.667 | 0.356  | 0.9470 |
| FLAML08         | 0.86           | 0.960 | 1.755 | 0.376  | 0.9557 |
| FLAML10         | 0.85           | 0.979 | 1.778 | 0.382  | 0.9621 |
| FLAML11         | 0.86           | 0.921 | 1.711 | 0.366  | 0.9517 |
| FLAML12         | 0.87           | 0.933 | 1.693 | 0.363  | 0.9576 |
| FLAML13         | 0.84           | 0.997 | 1.841 | 0.396  | 0.9579 |
| FLAML14         | 0.86           | 0.915 | 1.756 | 0.376  | 0.9468 |
| FLAML15         | 0.86           | 0.942 | 1.721 | 0.369  | 0.9607 |
| FLAML16         | 0.85           | 0.999 | 1.818 | 0.390  | 0.9600 |
| FLAML17         | 0.85           | 0.932 | 1.776 | 0.380  | 0.9462 |
| FLAML18         | 0.87           | 0.961 | 1.706 | 0.365  | 0.9623 |
| Flux(average)   | 0.87           | 0.927 | 1.693 | 0.362  |        |
| ERA5(average)   | 0.86           | 0.953 | 1.756 | 0.376  |        |
| Forest(average) | 0.86           | 0.940 | 1.724 | 0.369  |        |

**Table S13**R<sup>2</sup>, SD, RMSE for YCA station (double cropping farmland station).

| FLAML           | R <sup>2</sup> | SD    | RMSE  | nuRMSE | TSS    |
|-----------------|----------------|-------|-------|--------|--------|
| FLAML00         | 0.88           | 0.855 | 2.082 | 0.344  | 0.9468 |
| FLAML01         | 0.88           | 0.830 | 2.089 | 0.344  | 0.9405 |
| FLAML02         | 0.87           | 0.820 | 2.183 | 0.360  | 0.9318 |
| FLAML03         | 0.85           | 0.807 | 2.328 | 0.385  | 0.9208 |
| FLAML04         | 0.86           | 0.805 | 2.303 | 0.380  | 0.9239 |
| FLAML05         | 0.85           | 0.794 | 2.343 | 0.387  | 0.9166 |
| FLAML06         | 0.86           | 0.820 | 2.285 | 0.377  | 0.9286 |
| FLAML07         | 0.87           | 0.829 | 2.190 | 0.361  | 0.9368 |
| FLAML08         | 0.88           | 0.809 | 2.140 | 0.352  | 0.9306 |
| FLAML10         | 0.78           | 0.694 | 2.825 | 0.466  | 0.8404 |
| FLAML11         | 0.85           | 0.783 | 2.358 | 0.389  | 0.9120 |
| FLAML12         | 0.84           | 0.741 | 2.458 | 0.405  | 0.8864 |
| FLAML13         | 0.78           | 0.723 | 2.863 | 0.472  | 0.8575 |
| FLAML14         | 0.84           | 0.782 | 2.442 | 0.403  | 0.9080 |
| FLAML15         | 0.78           | 0.700 | 2.809 | 0.465  | 0.8433 |
| FLAML16         | 0.79           | 0.724 | 2.739 | 0.451  | 0.8636 |
| FLAML17         | 0.86           | 0.788 | 2.287 | 0.377  | 0.9164 |
| FLAML18         | 0.83           | 0.773 | 2.466 | 0.407  | 0.9035 |
| Flux(average)   | 0.87           | 0.819 | 2.216 | 0.366  |        |
| ERA5(average)   | 0.82           | 0.745 | 2.583 | 0.426  |        |
| Forest(average) | 0.84           | 0.782 | 2.400 | 0.396  |        |

**Table S14**

Annual GPP for cropland stations.

| Year    | GCA     | JRA     | JZA     | LCA     | SYA     | YCA     |
|---------|---------|---------|---------|---------|---------|---------|
| 2003    |         |         |         |         |         | 1660.44 |
| 2004    |         |         |         |         |         | 1608.06 |
| 2005    |         |         | 932.05  |         |         | 1851.30 |
| 2006    |         |         | 1253.66 |         |         | 2261.62 |
| 2007    |         |         | 1198.56 |         |         | 2589.95 |
| 2008    |         |         | 1011.93 |         |         | 2105.58 |
| 2009    |         |         | 2143.05 |         |         | 2435.54 |
| 2010    |         |         | 930.78  |         |         | 2065.19 |
| 2011    |         |         | 1101.77 |         |         |         |
| 2012    |         |         | 943.38  |         | 1281.01 |         |
| 2013    |         |         | 995.96  | 64.56   | 1443.65 |         |
| 2014    |         |         | 1361.07 | 1810.49 | 1296.93 |         |
| 2015    |         | 2048.21 |         | 1563.24 |         |         |
| 2016    |         | 1659.92 |         | 1817.80 |         |         |
| 2017    |         | 1097.61 |         | 2164.50 |         |         |
| 2018    |         | 1297.92 |         |         |         |         |
| 2019    |         | 3407.58 |         |         |         |         |
| 2020    | 2072.08 | 3245.50 |         |         |         |         |
| 2021    | 1817.55 |         |         |         |         |         |
| 2022    | 1870.31 |         |         |         |         |         |
| Average | 1919.98 | 2126.12 | 1187.22 | 1484.12 | 1340.53 | 2072.21 |
