# Supplementary material for: FLAML version 2.3.3 model-based assessment of gross primary productivity at forest, grassland, and cropland ecosystem sites
Source: Copernicus journal article supplement (doi:10.5194/gmd-2024-169), 2025-01-17
Supplement: Supplementary file [file gmd-2024-169-AC1-supplement.pdf]

Response

1、 We have to ask you to store the FLAML code and all the data that you use to produce your manuscript in one of the acceptable repositories according to our policy.

Response: It seems there may have been a misunderstanding regarding this section.

As per the journal's policy, we have stored both our code and data on Zenodo (DOI: 10.5281/zenodo.14542880). The GitHub link provided in our manuscript refers to the FLAML source code, which is maintained by its developers and is included solely to facilitate access to the library for other researchers.

The site-level flux data were obtained from <https://www.scidb.cn/en/>. However, the actual dataset used in our study has been processed and is also available on Zenodo.

If you believe our Code and Data Availability section still does not fully comply with the journal's guidelines, we would be happy to revise it accordingly. We look forward to your feedback.
