# Supplementary material for: FLAML version 2.3.3 model-based assessment of gross primary productivity at forest, grassland, and cropland ecosystem sites
Source: Copernicus journal article supplement (doi:10.5194/gmd-2024-169), 2025-01-17
Supplement: Supplementary file [file gmd-2024-169-AC2-supplement.pdf]

Response

1、Revisions to the Code and Data Availability section.

Response: We hope this message finds you well. Thank you very much for your valuable feedback. We have carefully considered your suggestions and made the necessary revisions. The FLAML source code in a zip file has been uploaded to Zenodo.

With the modifications outlined below, we believe it now fully complies with the requirements of the Code and Data Availability section.

“A Fast Library for Automated Machine Learning & Tuning (FLAML) is a Python library, and detailed documentation about FLAML can be found on GitHub. We have uploaded the related source code and documentation to Zenodo (<https://doi.org/10.5281/zenodo.14874754>, Laijie, 2025). The flux observation data and the Python source code of the FLAML-LUE used in this paper are also archived on Zenodo (<https://doi.org/10.5281/zenodo.14542880>, Laijie, 2024).”
